# Supplementary material
Source: Springer Nature journal article supplement (https://www.springermedizin.de/resource/supplementary/13550_2013_183_MOESM2_ESM.pdf/9687782)

**(A)**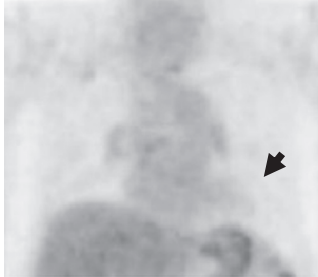**(B)**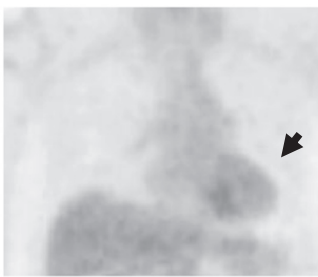**(C)**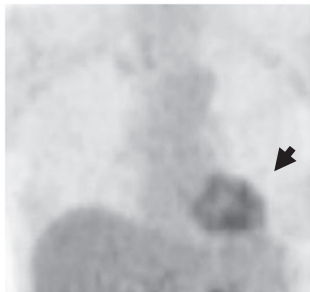**(D)**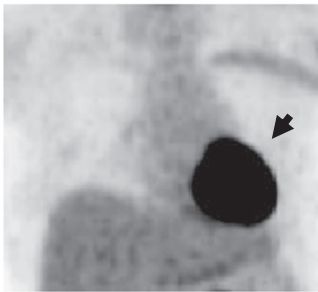

Supplement: MOESM2 [file 9687782]
